# Supplementary material
Source: PubMed Central journal article supplement (PMC2935050)
Supplement: supp_76_17_5718__1.pdf [file supp_76_17_5718__1.pdf]

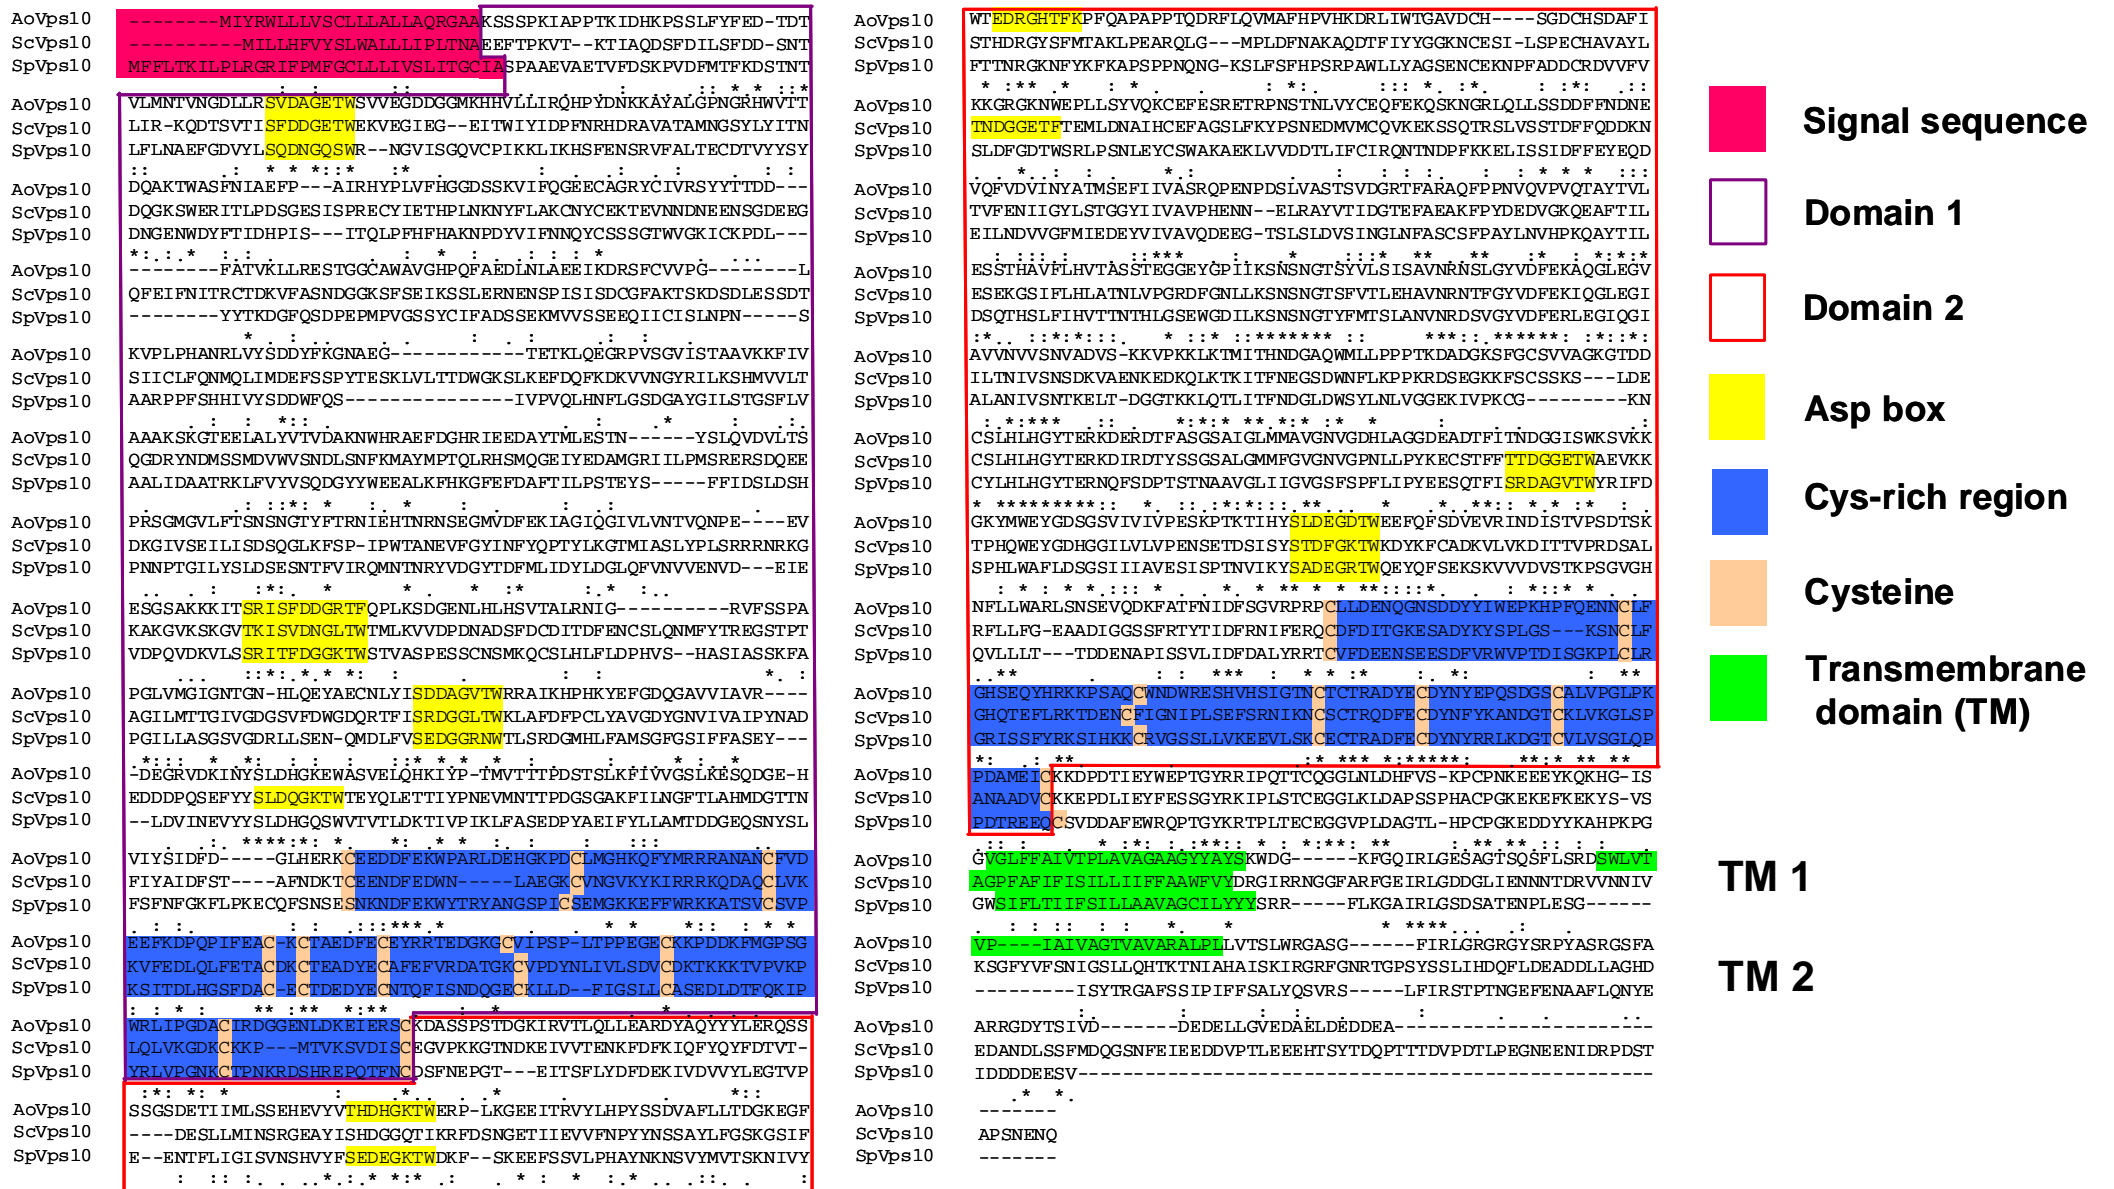

**Supplemental Fig. 1** Alignment of the amino acid sequences of AoVps10 and yeast Vps10p homologues. AoVps10, Vps10p from *A. oryzae*; SpVps10, Vps10p from *S. pombe*; ScVps10, Vps10p from *S. cerevisiae*. Identical residues among the three vacuolar protein sorting receptors are marked with asterisks. Residues with conserved and semi-conserved substitutions are indicated with colons and dots, respectively. The highly conserved amino acid motifs appear in colored boxes.
