# Supplementary material
Source: PubMed Central journal article supplement (PMC2935050)
Supplement: supp_76_17_5718__2.pdf [file supp_76_17_5718__2.pdf]

|                      |     |                                                                                               |
|----------------------|-----|-----------------------------------------------------------------------------------------------|
| <i>A. oryzae</i>     | 122 | IKKADPSALGIDPNVKQYTYGLDDNGNDKHLFYWFFESRNDPKNDPVVWLWLNNGGPGCSSL                                |
| <i>A. nidulans</i>   | 132 | IKKTDPSALGIDPDVKQYTYGLDDNENDKHLFYWFFESRNDPKNDPVVWLWLNNGGPGCSSL                                |
| <i>S. cerevisiae</i> | 112 | -KIKDPKILGIDPNVTQYTYGLDVEDEKHFHFWTFESRNDPAKDPVILWLNNGGPGCSSL                                  |
| <i>S. pombe</i>      | 574 | -KDSKPESLGIDT-VKQYTYGLDVED-DRHLFFWFFESRNDPENDPVVWLWLNNGGPGCSSL                                |
|                      |     | * . * . * * * . * . * * * * * : * : * : * : * * * * * : * * * : * * * * * * * * * *           |
| <i>A. oryzae</i>     | 182 | TGLFMELGSSIDEN-IKPVYNDFSWNSNASVIFLDQPVNVGYSYSG-SAVSDTVAAGKD                                   |
| <i>A. nidulans</i>   | 192 | TGLFMELGSSIDEN-IKPVYNPYAWNSNASVIFLDQPVNVGYSYSG-STVSDTVAAGKD                                   |
| <i>S. cerevisiae</i> | 171 | TGLFFELGSSIGPD-LKPIGNPYSWNSNATVIFLDQPVNVGFSYSGSSGVSNNTVAAGKD                                  |
| <i>S. pombe</i>      | 631 | TGLFMELGSSINIETLKPEYNPHSWNSNASVIFLDQPINTGFSNGD-DSVLDTVTAGKD                                   |
|                      |     | * * * * : * * * * * . : : * * * * . : * * * * : * * * * * : * . * : * . . . * : * * : * * * * |
| <i>A. oryzae</i>     | 240 | VYALLSLFFKQFPEYA--EQDFHIAGESYAGHYIPVFASEILAHKN-----                                           |
| <i>A. nidulans</i>   | 250 | VYALLTLFFKQFPEYA--EQDFHIAGESYAGHYIPVFTSEILSHQK-----                                           |
| <i>S. cerevisiae</i> | 230 | VYNFLELFFDQFPEYVKNKGQDFHIAGESYAGHYIPVFASEILSHKD-----                                          |
| <i>S. pombe</i>      | 690 | VYAFNLNLFKQFPEYAH--LDFHIAGESYAGHYIPQFAKEIMEHNQGANFVVASGYEMEK                                  |
|                      |     | * * : * * * * : * * : * . * * * * * * * * * * * * * : * . * * : * .                           |
| <i>A. oryzae</i>     | 284 | RNINLKSVLIGNGLTDGLTQYGYRPMGCGEGGYKAVLDEATCESMDNALPRCRSMIESC                                   |
| <i>A. nidulans</i>   | 294 | RNINLKSVLIGNGLTDGLTQYGYRPMACGEGGYPAVLDESSCRSMDNALGRCQSMIESC                                   |
| <i>S. cerevisiae</i> | 276 | RNFNLTSVLIGNGLTDPLTQYNYEPMACGEGGEPVLPSEECSAMEDSLERCLGLIESC                                    |
| <i>S. pombe</i>      | 748 | QYINLKSVLIGNGLTDPLVQYFYGKMACESPYPG-IMSQEECDRITGAYDTCAKLTGTC                                   |
|                      |     | : : * * . * * * * * * * * * * * * * * * * * * . : : . * : : * : * * . *                       |
| <i>A. oryzae</i>     | 344 | YNSESAWVCVPASIYCNNAIIGPYQRTGQNVYDVRSKCEDESNLCYKMGYVSEYLNKAE                                   |
| <i>A. nidulans</i>   | 354 | YNSESAWVCVPASIYCNNAIILAPYQRTGQNVYDVRGKCEDESNLCYKMGYVSEYLNKPE                                  |
| <i>S. cerevisiae</i> | 336 | YDSQSVWSCVPATIYCNNAQLAPYQRTGRNVYDVRKCEG-GNLCYPTLQIDDYLNQDY                                    |
| <i>S. pombe</i>      | 807 | YQTGFTPVICI GASLYCNNAIIGPFTKTGLNIYDIREECDRQEHLCYPETGAIESYLNQEF                                |
|                      |     | * : : . * : * : * * * * * : * : * : * * * * * * * . . : * * * : : . * * * :                   |
| <i>A. oryzae</i>     | 404 | VREA VGAEVGGYDSCNF DINRNFLFHGDWMKP-YHRLVPGLL-EQIPVLIYAGDADYICN                                |
| <i>A. nidulans</i>   | 414 | VRAA VGAEVDGYDSCNF DINRNFLFHGDWMKP-YHRLVPGIL-EQIPVLIYAGDADFICN                                |
| <i>S. cerevisiae</i> | 395 | VKEA VGAEVDHYE SCNF DINRNFLFHGDWMKP-YHTAVTDLLNQDLPILVYAGDKDFICN                               |
| <i>S. pombe</i>      | 867 | VQEALGVEYD-YKGCNTEVNI GF LFKGDWMRKTFRDDVTAILEAGLPVLIYAGDADYICN                                |
|                      |     | * : * : * . * . * * * : * * * * * * * : : * . * : * : * * : * * * * * * * *                   |
| <i>A. oryzae</i>     | 462 | WLGKAWTEALEWPGQKEYASAELEDLKI EQNEHTGKKIGQVKSHGNFTFMRLYGGGHMV                                  |
| <i>A. nidulans</i>   | 472 | WLGKAWTEALEWPGHKEFAAAPMEDLKI V DNEHTGKKIGQIKTHGNFTFMRLYGGGHMV                                 |
| <i>S. cerevisiae</i> | 454 | WLGKAWTDVLPWKYDEEFASQKVRNWTAS---ITDEVAGEVKS YKHFTYLRVFNNGGHMV                                 |
| <i>S. pombe</i>      | 926 | YMGNEAWTDALWAGQREFYEAELKPWSPN-----GKEAGRGKSFKNFGYLRLYEAGHMV                                   |
|                      |     | : * * : * * * : * * . . * : : . . . : * . * : . * : * : * : * * * *                           |
| <i>A. oryzae</i>     | 522 | PMDQPEASLEFFNRWLGGGEWF-                                                                       |
| <i>A. nidulans</i>   | 532 | PMDQPEASLEFFNRWLGGGEWF-                                                                       |
| <i>S. cerevisiae</i> | 511 | PFDPENALSMVNEWIHGGFSL                                                                         |
| <i>S. pombe</i>      | 981 | PFNQPEASLEMLNSWIDGSLFA                                                                        |
|                      |     | * : : * * : * . : . * * : *                                                                   |

**Supplemental Fig. 2** Comparison of the predicted amino acid sequence of *A. oryzae* AoCpyA with CPYs from other organisms. The numbers show the position of the amino acid residues in each mature CPY while dashes indicate gaps introduced into the sequences to facilitate optimal alignments. Asterisks indicate amino acid residues which share identity. Residues with conserved and semi-conserved substitutions are indicated with colons and dots, respectively.
