# Supplementary material
Source: PubMed Central journal article supplement (PMC2935050)
Supplement: supp_76_17_5718__3.pdf [file supp_76_17_5718__3.pdf]

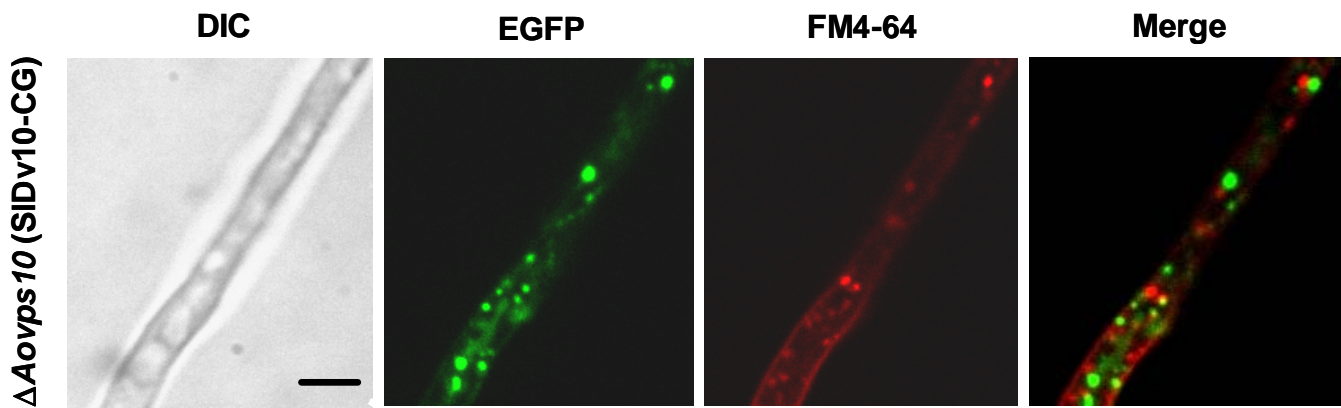

**Supplemental Fig. 3** The dispersed, round structures observed in the  $\Delta Aovps10$  strain are not colocalized to the endosomes. The strain SIDv10-CG, which expressed AoCpyA-EGFP, was cultivated in CD medium adjusted to pH 5.5 at 30°C for 18 h. The culture was stained by FM4-64, and was observed by differential interference contrast (DIC) and confocal laser microscopy. Bar, 5  $\mu$ m.
